# Supplementary material
Source: bioRxiv or medRxiv preprint supplement (https://medrxiv.org/highwire/filestream/80700/field_highwire_adjunct_files/0/2020.05.09.20096735-1.pdf)
Supplement: Supplementary file [file 2020.05.09.20096735-1.pdf]

## **SUPPLEMENTARY DATA**

### **Modelling the evolution of COVID-19 in high-incidence European countries and regions: estimated number of infections and impact of past and future intervention measures**

Juan Fernández-Recio

Instituto de Ciencias de la Vid y del Vino (ICVV), CSIC - Universidad de La Rioja  
- Gobierno de La Rioja, Ctra. Burgos Km. 6, 26007 Logroño, Spain.

Correspondance to: Juan Fernández-Recio ([juan.fernandezrecio@icvv.es](mailto:juan.fernandezrecio@icvv.es)). Tel: +34 941894980. Fax: +34 941899728

**Supplemental Table 1.** Parameters (reproduction number and initial infections) obtained by using additional interventions in the modeling

| <b>Country / region</b> | <b>Mean <math>R_0</math> [95% credible interval]</b> | <b>Interventions</b> | <b>Mean <math>R_t</math> after intervention [95% credible interval]</b> | <b>Estimated infections in first 6 days [95% credible interval]</b> |
|-------------------------|------------------------------------------------------|----------------------|-------------------------------------------------------------------------|---------------------------------------------------------------------|
| Spain                   | 4.80 [4.15-5.51]                                     | 14 Mar<br>1-6 Apr    | 0.61 [0.53-0.70]<br>0.46 [0.10-0.62]                                    | 401 [154-852]                                                       |
| La Rioja                | 3.22 [2.38-4.37]                                     | 14 Mar<br>1-6 Apr    | 0.63 [0.47-0.80]<br>0.33 [0.02-0.62]                                    | 78 [9-249]                                                          |
| Iceland                 | 1.82 [1.17-2.54]                                     | 24 Mar<br>3 Apr      | 1.13 [0.67-1.62]<br>0.38 [0.31-0.45]                                    | 92 [8-385]                                                          |

## Spain

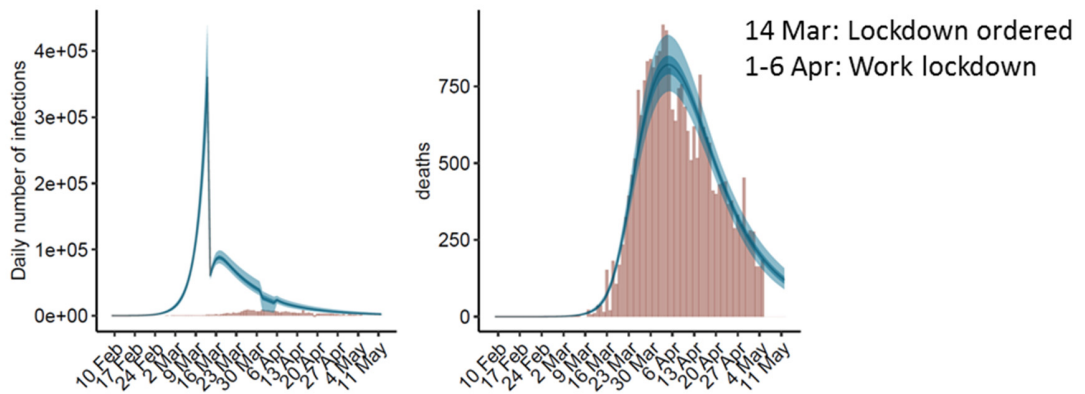

## La Rioja

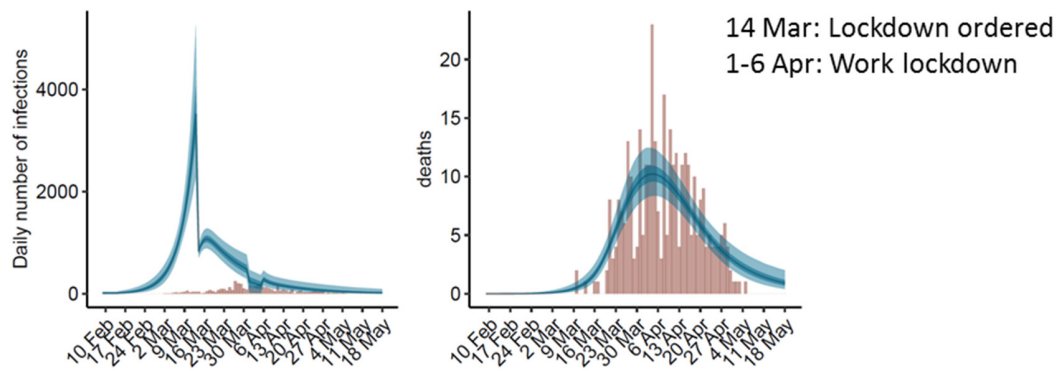

## Iceland

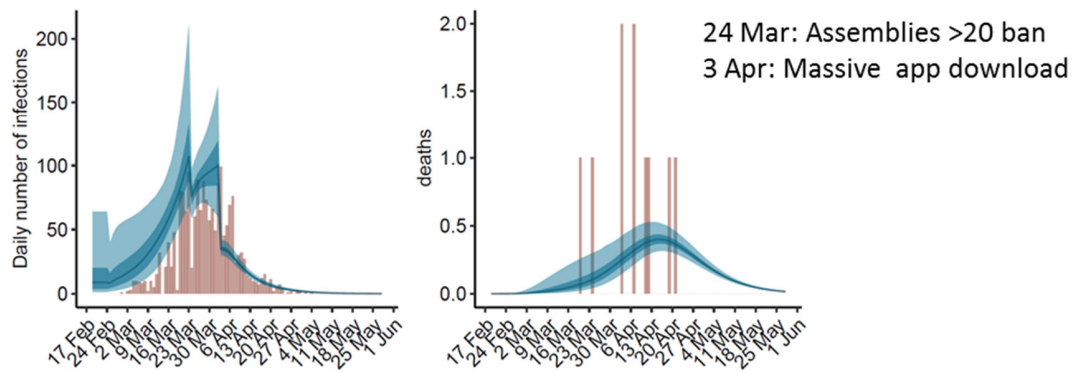

**Supplemental Figure 1.** Estimates of infections and deaths obtained by using additional interventions in the model (Table S1).

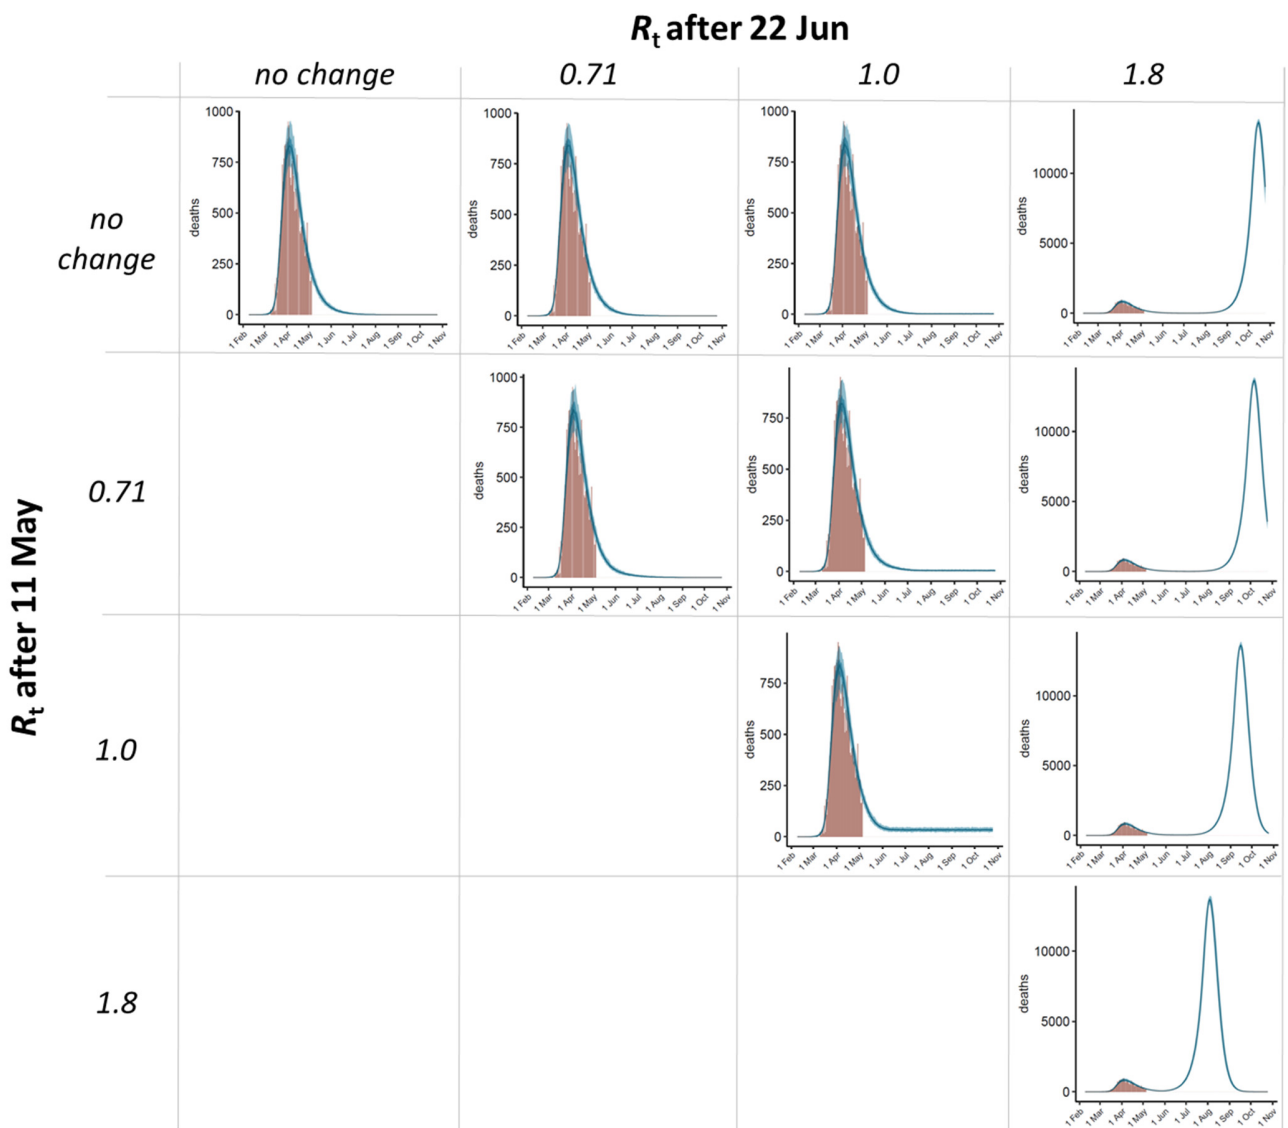

**Supplemental Figure 2.** Estimated evolution of daily deaths over time in Spain for different scenarios according to current model, depending on the potential effects on  $R_t$  of the planned changes in the intervention measures in two key dates (11 May and 22 June)

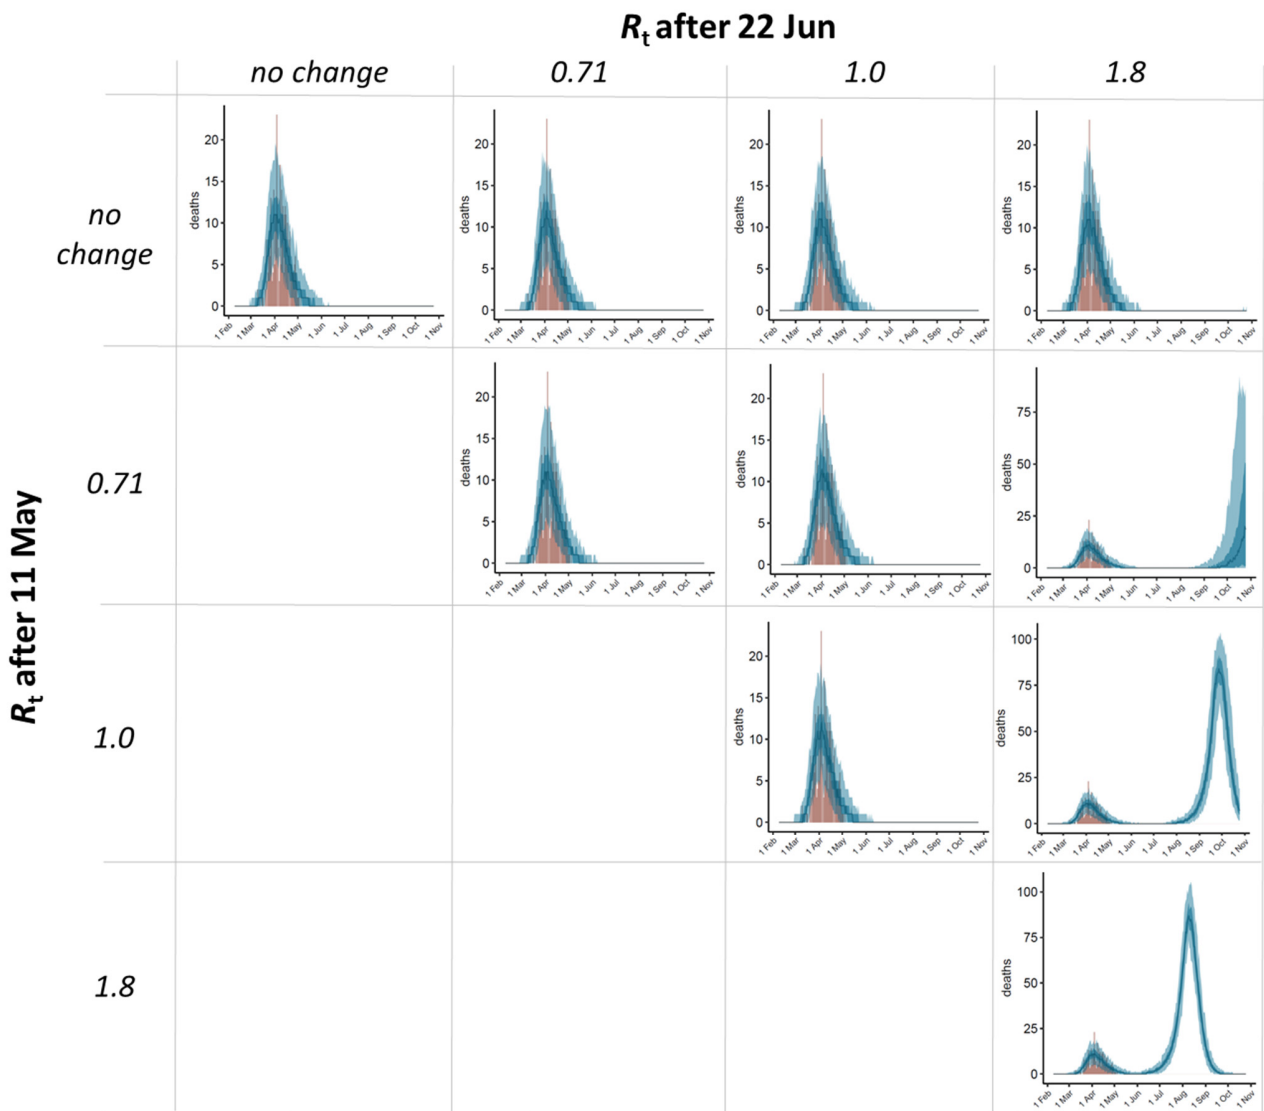

**Supplemental Figure 3.** Estimated evolution of daily deaths over time in La Rioja for different scenarios according to current model, depending on the potential effects on  $R_t$  of the planned changes in the intervention measures in two key dates (11 May and 22 June).

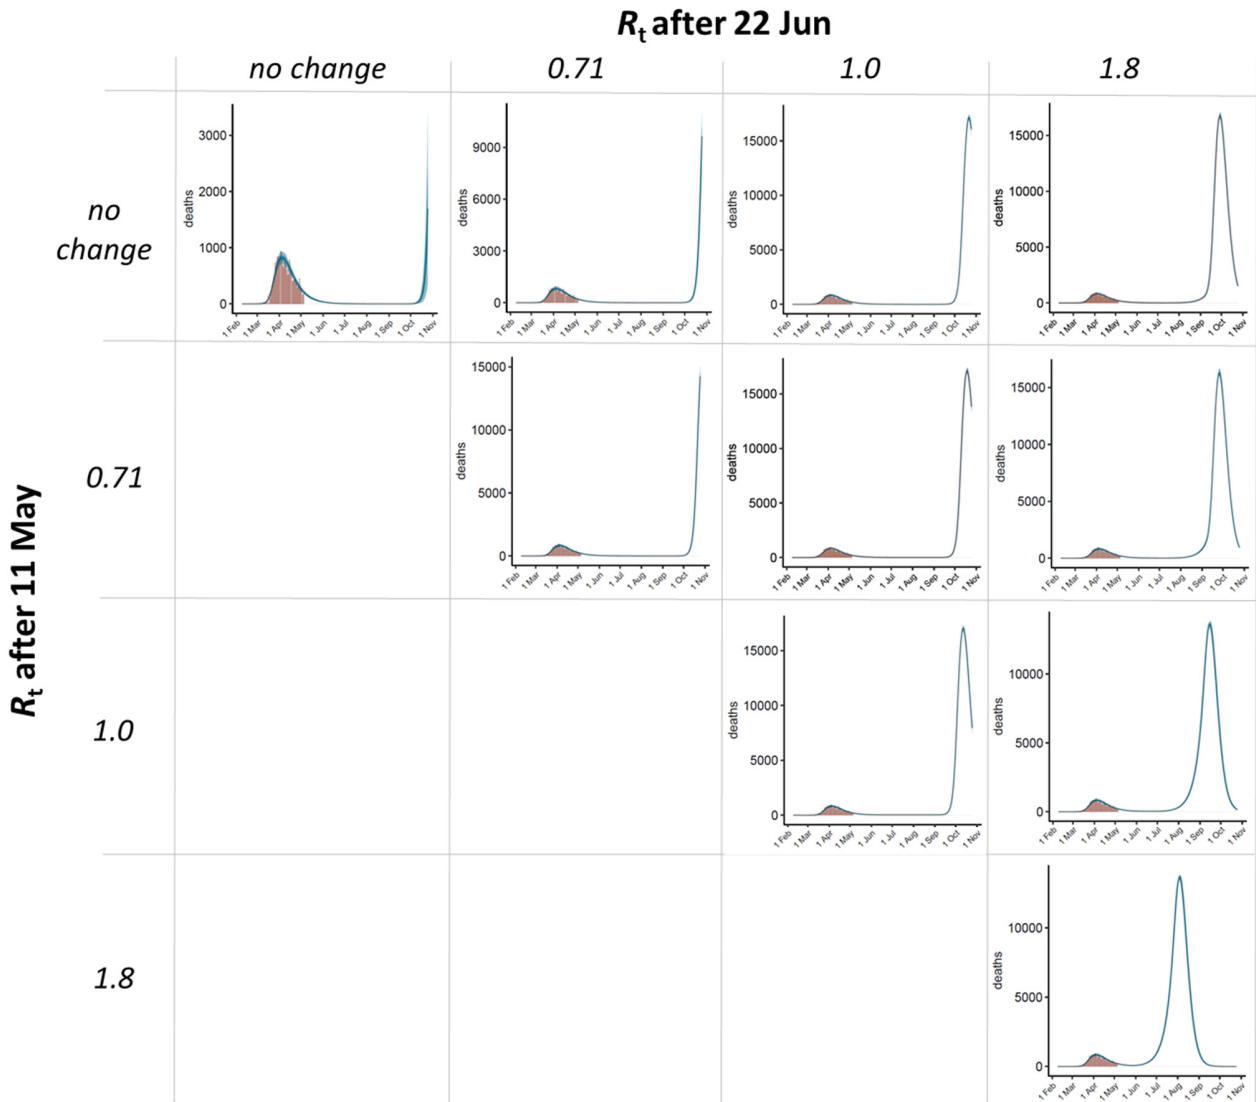

**Supplemental Figure 4.** Estimated daily deaths over time in Spain for different scenarios according to current model, depending on the potential effects on  $R_t$  of the planned changes in the intervention measures in two key dates (11 May and 22 June), considering return to total normality on 1 September 2020.

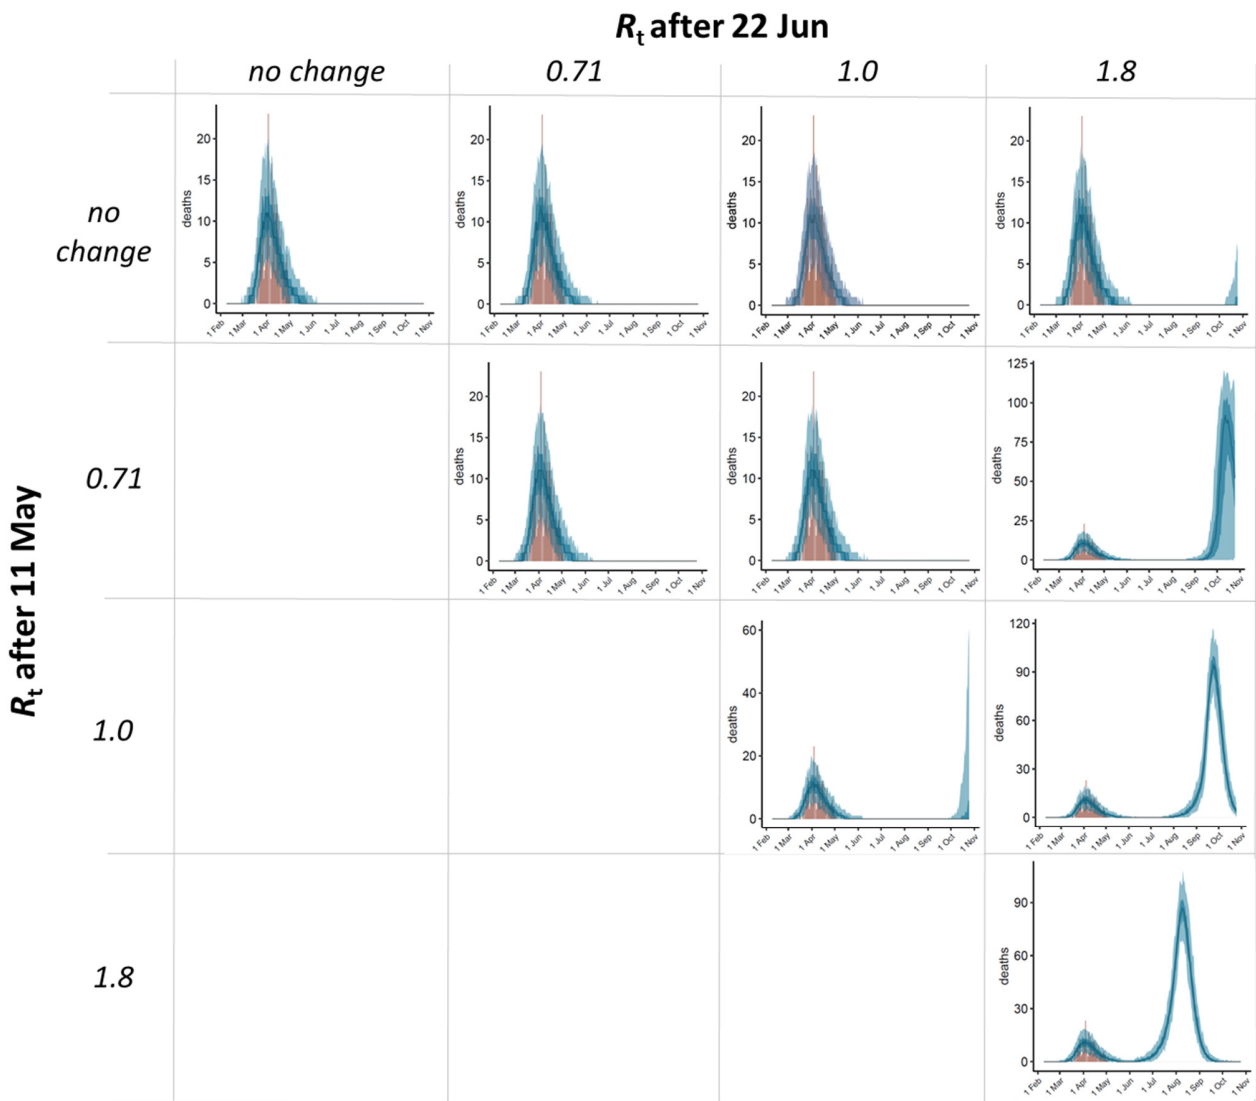

**Supplemental Figure 5.** Estimated daily deaths over time in La Rioja for different scenarios according to current model, depending on the potential effects on  $R_t$  of the planned changes in the intervention measures in two key dates (11 May and 22 June), considering return to total normality on 1 September 2020.
